# Supplementary material
Source: PubMed Central journal article supplement (PMC1489111)
Supplement: molcellb_26_12_4746__2.pdf [file molcellb_26_12_4746__2.pdf]

Figure 2S

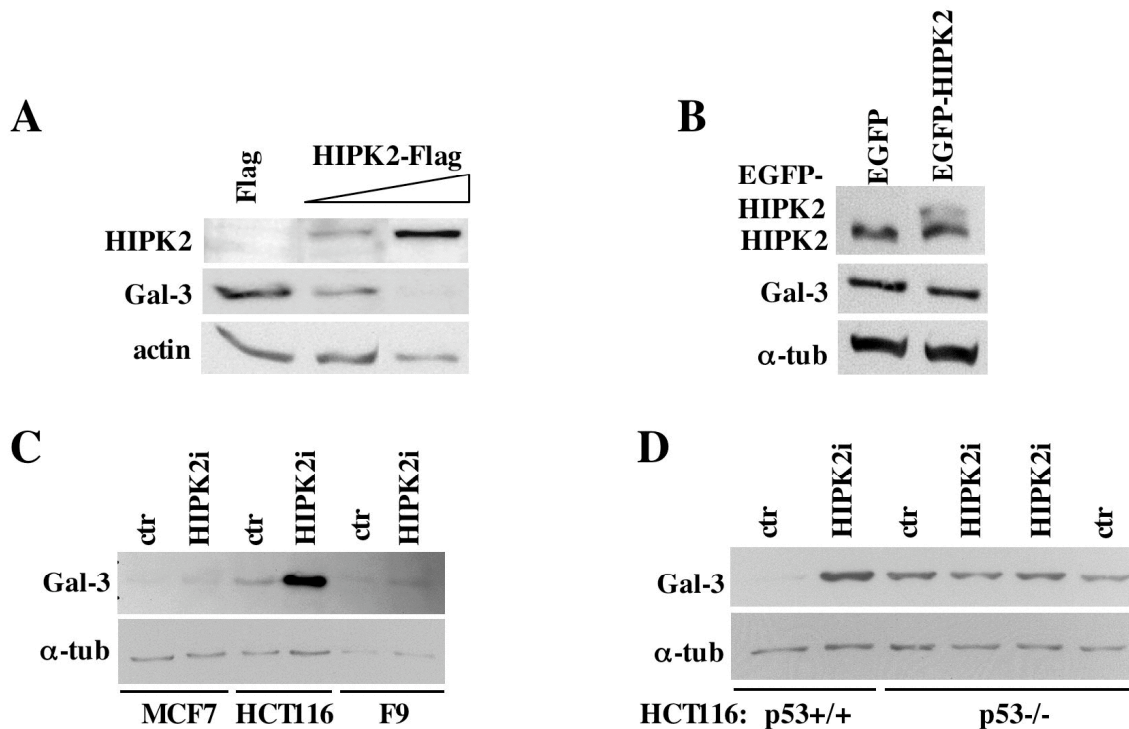

**FIG. 2S.** HIPK2 involvement in the regulation of Gal-3 expression. (A) Immunoblots with antibodies to Flag and Gal-3 on HEK293 cells transfected with 5 and 10 µg of pCMV-HIPK2Flag or 10 µg of pCMVFlag2B control vector. Actin was used as l.c.. (B) Immunoblots with antibodies to HIPK2 and Gal-3 on p53-null H1299 cells transfected with pEGFP-C2 control, wild type HIPK2 (pEGFP-HIPK2), or HIPK2 kinase dead mutant (pEGFP-HIPK2-K221R) vector. α-tubulin was used as l.c. (C) Immunoblot of Gal-3 in three different cell lines carrying an endogenous wtp53 gene and stably transfected with pSUPER-ctr or pSUPER-HIPK2 vectors. (D) A similar immunoblot experiment as in C was performed on the same HCT116 p53+/+ cell populations reported in C and on four different populations (two controls and two HIPK2i) derived from the HCT116 p53-/- isogenic cells. α-tubulin was used as l.c.
