# Supplementary material
Source: PubMed Central journal article supplement (PMC1489111)
Supplement: molcellb_26_12_4746__3.pdf [file molcellb_26_12_4746__3.pdf]

Figure 3S

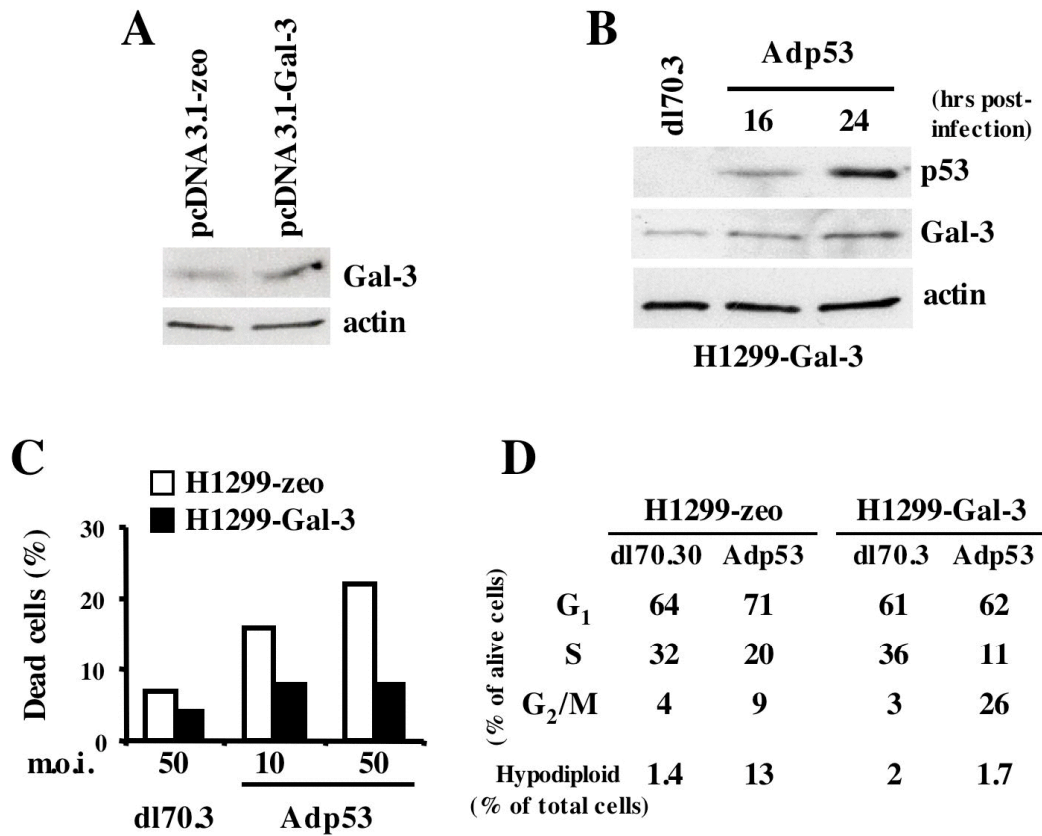

**FIG. 3S.** Exogenous Gal-3 expression interferes with p53-mediated apoptosis. (A) Immunoblots with antibody to Gal-3 on H1299 cells stably transfected with pcDNA3.1/Zeo or pcDNA3.1/Gal-3 vectors. Actin was used as l.c.. (B) Immunoblot kinetics of p53 and Gal-3 on the H1299-Gal-3 cells described in A. The cells were infected with dl70.3 control or Adp53 adenoviruses and collected at the indicated times. Actin was used as l.c. (C) H1299-Gal-3 cells and their relative control H1299-zeo were infected with dl70.3 or Adp53 at the indicated m.o.i.. At 24h post-infection, percentages of dead cells were determined by trypan blue exclusion. One representative experiment out of three independent performed is reported. (D) Percentage of cells in the different phases of the cell cycle as measured from flow cytometric analyses of PI stained cells.
